# Supplementary material for: Protein Level Defense Responses of Theobroma cacao Interaction With Phytophthora palmivora
Source: Frontiers journal article supplement (doi:10.3389/fagro.2022.836360), 2022-02-10
Supplement: Table_5.XLSX [file Table_5.XLSX]

## Sheet: Node properties
Supplemental Table S5 Node properties of the Arabidopsis thaliana protein network homologous to those identified as differentially accumulated in leaf discs of the cacao PA150 genotype. a Protein identification number as in STRING database. b Betweenness values; c Node degree values and d Number of cluster of the correspondent protein as calculated with the package igraph in Rstudio software.
Nodes with an betweenness value above the average (1748.55) are called a bottleneck. Nodes with a node degree value above the average (42.02) are called hubs.
Protein IDa	Betweennessb	Node Degreec	Clusterd
AT5G13770	0	2	2
AT3G56290	0	3	2
AT1G77090	5.29613	8	2
AT4G27700	44.3596	10	2
AT2G04039	59.8539	14	2
AT1G18060	86.9478	12	2
AT1G44000	84.3795	12	2
FTSH1	53.5497	9	2
PHT2;1	404.48	11	2
AT3G01060	9.25878	6	2
CaS	995.387	29	2
AT5G08050	566.372	22	2
ATH13	27.9122	7	2
ABA1	42.8592	6	2
AOR	12937	51	2
ZKT	666.344	40	2
TLP18.3	1332.59	82	2
PGR5	1.43116	6	2
PGRL1A	393.071	35	2
CRB	7294.72	87	2
SDR1	570.736	13	9
AT1G54870	287.757	11	9
ALDH5F1	455.402	11	9
AT2G34460	1051.35	26	2
OHP	162.701	26	2
HCF244	2088.71	33	2
PMDH2	14737.7	102	1
AT5G58330	890.966	24	1
ALDH11A3	16088.2	89	1
FBA1	1695.27	57	1
GUN4	618.407	29	2
AT5G37980	0	4	9
PRK	16925.3	107	2
AT2G24190	287.757	11	9
AT5G37940	0	4	9
HCEF1	16421.3	104	1
SBPASE	22107.4	122	1
ACX6	0	12	9
CHLI1	3767.77	52	2
FBA2	12920.8	132	1
ACX5	0	12	9
NPQ4	5118.78	98	2
LHCB5	1314.6	72	2
ACX1	0	12	9
GAPA-2	12197.3	120	1
ACX4	394.794	13	9
PETC	27972.8	136	2
CHLM	1839.67	28	2
ALB1	10.789	6	2
GUN5	9134.35	35	2
ACX3	0	12	9
PKT3	451.787	14	9
KAT5	394.794	13	9
ACX2	0	12	9
AT3G58700.1	0.0948162	4	4
AT1G56190	14.464	56	1
RPL16A	89.798	108	4
HPR	3125.42	81	2
AGT	2997.09	44	1
SCO1	32213.7	115	1
GDCH	2148.06	64	1
EMB3105	1062.17	60	2
AT5G45775.2	0.0948162	5	4
TIM	1753.61	82	1
AT1G11860	38257.4	104	1
RPL5A	4285.28	140	4
AT4G01310	20564.1	149	4
RPL16B	0.0948162	4	4
RPL5B	2821.67	137	4
PGK	16916.2	82	1
ATPD	23483	153	2
AT2G07698	4516.25	54	2
SHM1	52086.2	104	1
ATP5	471.424	68	2
PB	20373.7	113	2
ATPQ	16960.4	85	2
AT5G08680	6892.36	73	2
AT1G32470	15890.7	110	1
GLDP2	6432.11	70	1
GAPB	29674.3	154	1
PGK1	28163.6	120	1
AT5G08670	8661.45	75	2
ATPA	10549.6	86	2
GAPA	10930.8	109	1
TPI	984.793	79	1
MFP2	2363.64	19	9
AT5G47720	394.794	13	9
ATPC1	38376.4	164	2
ATP1	8836.01	74	2
AT5G08690	18720.9	88	2
AT5G47030	438.15	63	2
ATPF	1085.28	81	2
ATPE	2195.39	100	2
AT2G35120	46.4822	35	1
GLDP1	18120.6	85	1
AIM1	2363.64	19	9
ACAT2	394.794	13	9
AT4G19630	0	24	3
AT4G18870	0	24	3
HSFA6A	0	24	3
AT1G77570	0	24	3
HSFB3	0	24	3
PEL1	0	2	4
HSFB4	0	24	3
HSFA1E	0	24	3
HSFA3	3730.65	42	3
HSFA9	0	24	3
AT-HSFA5	0	24	3
HSFA4C	0	24	3
HSFA6B	0	24	3
HSFC1	0	24	3
HSF4	0	24	3
HSFB2A	0	24	3
AT-HSFA7B	0	24	3
HSFA7A	0	24	3
HSFA8	0	24	3
HSFA4A	0	24	3
HSFA2	0	24	3
AT-HSFB2B	0	24	3
HSF1	3730.65	42	3
HSF3	0	24	3
ERF1-1	22.0679	65	4
ERF1-3	22.0679	65	4
ERF1-2	22.0679	65	4
LOS1	17.6342	58	4
At1g07940	33845.1	77	4
AT2G18110	11.1959	43	4
AT5G12110	10.2842	38	4
EMB3113	22837.5	151	4
AT1G57720	7563.46	80	4
AT5G19510	17.1522	55	4
AT1G09640	2518.21	82	4
eEF-1Bb1	10.3368	40	4
AT3G53430	176.958	123	4
AT5G07090	600.106	144	4
AT5G04800	87.1113	114	4
AT5G16130	163.181	97	4
AT3G09630	1289.92	133	4
AT5G22440	215.594	125	4
AT5G58420	456.082	143	4
RPL10B	59.3476	83	4
RPL23AA	276.86	127	4
AT3G49910	260.77	125	4
PGY1	215.594	125	4
P40	3066.44	152	4
AT5G20290	176.757	101	4
ATARCA	14508.5	98	4
AT2G36160	169.453	119	4
AT2G37190	189.575	124	4
AT5G15200	1139.98	146	4
AT4G18100	2.12482	64	4
AT3G09200	895.292	131	4
RPL3B	24.3701	68	4
AT3G04230	269.129	127	4
EMB2296	704.421	129	4
AT1G70600	2.30221	65	4
AT2G31610	5434.67	177	4
AT3G53870	5222.92	173	4
AT3G10610	9.13419	68	4
RPL27AB	169.677	120	4
AT3G07110	1042.31	129	4
AT4G10450	258.355	127	4
SAC52	3322.62	148	4
AT2G34480	31.4916	72	4
AT1G48830	163.181	97	4
AT3G51190	12.0619	71	4
AT3G04840	528.089	140	4
AT2G44120	1123.1	145	4
EMB1080	1887.84	153	4
AT1G67430	241.476	126	4
AT5G60670	176.958	123	4
AT3G11250	375.285	122	4
AT3G47370	669.772	127	4
XW6	991.126	136	4
AT3G11510	156.942	118	4
AT3G24830	358.566	125	4
RPS5B	2090.15	151	4
AT2G41840	4108.1	154	4
EMB2207	304.899	119	4
AT2G09990	307.411	133	4
AT1G27400	514.714	127	4
AT5G67510	260.77	125	4
AT5G02870	4444.63	137	4
AT5G61170	175.138	100	4
RPL23AB	276.86	127	4
AT5G35530	5288.97	175	4
AT2G01250	326.051	122	4
RPS11-BETA	2173.92	155	4
AT1G08360	397.293	128	4
AT3G52580	156.942	118	4
RPS6A	1114.37	145	4
AT3G19480	3.55382	6	1
PSB29	91.009	26	2
AT2G38660	59.953	22	1
AT3G12290	69.7761	23	1
pde194	0	12	1
AT4G00600	112.426	24	1
EMB3127	459.776	27	1
GR	10969.6	78	1
MTHFR1	5.68784	14	1
MTHFR2	18.2237	16	1
AT5G47435	99.1305	18	1
AT4G17360	99.1305	18	1
THFS	90.0118	26	1
AOAT2	286.894	40	1
THY-1	40290.5	73	1
THY-2	41641.9	74	1
RPS1	12854.1	115	2
SHM6	263.168	41	1
EDA36	263.168	41	1
SHM7	263.168	41	1
SHM4	298.234	42	1
SHM2	286.501	42	1
GLN1-1	1.18076	27	1
GLN1;5	1.18076	27	1
GLN1;4	1.18076	27	1
SHM3	286.501	42	1
GLN1.3	1.18076	27	1
AT2G37690	2087.36	25	1
AT1G31220	160.827	24	1
GDH2	190.911	35	1
mtLPD1	10630.5	99	1
GDH1	235.35	36	1
LTA2	77.5267	26	1
GLU2	3427.53	89	1
GLT1	31458.3	135	1
AT4G26910	9.05287	19	1
RPL15	1237.6	55	2
ENO1	5678.2	90	1
EMB3126	552.028	44	2
PUR4	468.162	22	1
AT2G35040	154.586	21	1
AT2G43030	591.539	51	2
GLU1	26182	129	1
GS2	1241.58	39	1
PRPL11	1747.93	62	2
AT4G16155	6331.09	94	1
ATP3	1373.53	72	2
EMB3003	77.5267	26	1
AT2G34590	650.655	55	1
AtCg00790	333.792	46	2
RPL3P	0.390123	21	2
MAB1	3110.6	67	1
mtLPD2	9433.16	97	1
ENOC	1120.93	84	1
LOS2	12576.8	89	1
RPL4	696.946	50	2
RPS9	2113.27	129	4
LPD1	8820.98	95	1
AT5G55070	9.05287	19	1
AT5G65220	15.5613	42	2
AT3G54210	632.325	54	2
ATPC2	899.786	76	2
AT3G01790	0.390123	21	2
RPL24	573.407	48	2
EMB3136	1563.6	59	2
AT5G64670	352.076	43	2
RPL22	53.2634	21	2
AtMg00080	333.792	46	2
emb1473	5952.66	102	2
AT2G42710	13.9695	40	2
AT5G13900	0	1	13
AT2G19970	0	1	13
MRN1	0	1	13
AT4G29520	0	2	13
AT1G45015	12	5	13
AT3G53980	12	5	13
AT5G05960	1	2	13
RPI2	31.544	15	1
AT5G64380	14.3248	40	1
FBP	10.8658	38	1
AT5G44520	29.1115	14	1
AT4G32480	0.0689655	4	1
APL4	0	7	1
G6PD4	47.364	55	1
G6PD6	68.1933	56	1
G6PD1	117.704	60	1
EMB3119	192.969	17	1
G6PD5	53.4993	56	1
G6PD3	96.6234	57	1
G6PD2	47.364	55	1
FBA4	409.929	86	1
APL3	0.236111	8	1
RSW10	216.826	17	1
FBA7	409.929	86	1
PDE345	369.588	84	1
APL2	0	8	1
FBA5	409.929	86	1
AT3G01850	258.393	18	1
AT1G63290	284.774	19	1
ADG1	0	8	1
AT1G12230	346.013	82	1
UGP1	2.55516	13	1
RPE	894.752	31	1
PFK4	172.121	63	1
AT3G60750	1401	97	1
APL1	40.5422	9	1
PFK6	173.777	64	1
AT1G20950	502.862	60	1
PFK5	501.586	64	1
PFK7	306.622	65	1
MEE51	173.626	58	1
At1g78050	82.1541	58	1
AT5G34780	191.999	20	1
PFK1	204.288	64	1
PFK3	172.121	63	1
HXK1	234.665	48	1
AT1G18270	1328.83	65	1
AT1G21400	23.0312	15	1
AT2G45290	650.097	94	1
TRA2	996.289	85	1
AT1G76550	173.626	58	1
AT3G29320	356.946	18	1
PFK2	501.586	64	1
AT5G09300	1.65526	15	1
AT1G12000	498.964	59	1
FBA8	416.018	87	1
GAPC2	5251.76	59	1
AT3G55810	538.514	64	1
PHS2	109.81	16	1
AT3G49160	538.514	64	1
AT3G04050	538.514	64	1
PKp3	852.893	68	1
AT3G25960	538.514	64	1
AT4G26390	538.514	64	1
AT2G36580	857.612	70	1
AT5G56350	909.731	72	1
AT5G63680	805.664	68	1
PGM3	558.706	47	1
GAPCP-1	955.441	68	1
AT5G08570	979.144	70	1
PKP-ALPHA	1091.41	69	1
AT3G13930	95.236	29	1
PKP-BETA1	1091.41	69	1
IAR4	370.9	53	1
AT3G55650	588.271	65	1
At1g59900	225.647	44	1
GAPCP-2	1611.28	68	1
PGM2	432.184	45	1
AT5G42740	7310.2	99	1
LTA3	141.782	31	1
GAPC1	867.665	71	1
PGI1	8633.91	101	1
PGMP	1872.02	50	1
AT1G54220	201.946	28	1
SKIP5	0.125	6	8
AT2G45260	0.80119	9	8
AT3G12940	1.12619	10	8
SCAR2	0.125	8	8
AT3G11960	1.12619	10	8
AT5G07940	0.392857	9	8
AT4G29790	1.12619	10	8
RST1	0.392857	9	8
ACS12	0.267857	8	8
AT4G27220	0.328904	2	2
AT5G63020	0.328904	2	2
RPP8	0.328904	2	2
AT4G27190	0.328904	2	2
AT5G47260	0.328904	2	2
AT5G43730	0.328904	2	2
AT5G05400	0.328904	2	2
AT5G43740	0.328904	2	2
AT4G10780	0.328904	2	2
At4g26090	0.328904	2	2
AT5G48620	0.328904	2	2
AT5G35450	0.328904	2	2
AT5G47250	0.328904	2	2
AT4G16095	0.328904	2	2
TAPX	1126.59	10	2
SAPX	0.328904	2	2
APX5	0.328904	2	2
APX6	0.328904	2	2
APS4	153.954	15	6
SOX	9.7159	6	6
APS1	153.954	15	6
APS3	153.954	15	6
APX3	1917.47	7	1
APX2	0.328904	2	2
CYTC-2	14380.9	48	2
CYTC-1	14498.8	45	2
AT3G52730	52.1975	29	2
MPPalpha	803.173	35	2
AT2G07727.1	47.2816	27	2
COX2	1545.25	46	2
AT4G37830	1.14438	20	2
AT1G52710	570.959	32	2
AT1G80230	691.753	37	2
AT3G15640	614.025	35	2
PETD	2586.81	79	2
PETB	2708.41	85	2
AT5G13430	1708.03	67	2
AT1G51980	834.297	39	2
AT3G27240	1086.04	55	2
AT5G25450	87.1119	30	2
AT4G32470	101.119	32	2
AT5G13440	1708.03	67	2
MPPBETA	2771.14	48	2
AT5G40810	1086.04	55	2
cob	260.093	41	2
COX1	240.725	38	2
GRXS17	17581	44	1
ftsh4	0.0546476	3	2
FTSH11	0.0546476	3	2
VHP2;2	0.550805	25	2
SHD	59031	91	3
PPa4	0.550805	25	2
PPa3	0.550805	25	2
PPa2	0.550805	25	2
PPa6	492.377	31	2
PPa5	0.589266	27	2
YCF10	78.1922	47	2
atp6-1	118.624	35	2
ATP6-2	142.343	45	2
AVA-P1	644.5	30	2
AT4G32530	653.872	41	2
AT2G16510.1	644.5	30	2
PSBB	591.809	58	2
VHA-C3	652.796	39	2
AT1G51650	94.9984	39	2
PSAB	1120.71	61	2
PSAC	6763.85	71	2
ACLA-1	0	5	2
ACC1	44.7407	9	2
AVA-P2	652.77	38	2
ATP6-1	199.64	46	2
PSBE	563.602	58	2
AVA-P4	652.77	38	2
AT2G25610	653.872	41	2
ATPI	1447.75	83	2
AT2G20420	12.1356	5	2
ACLB-1	5216.72	42	2
RPS7	106.338	105	4
ACLA-2	0	5	2
ACLB-2	5136.73	42	2
RPS7.1	106.338	104	4
AT5G43640	0.271036	33	4
RPS11	93.2435	103	4
AT5G18380	50.5819	78	4
PSBC	958.806	64	2
PSBH	315.223	55	2
RPS7.2	106.338	105	4
AT5G09490	0.271036	33	4
RPS5A	966.44	133	4
AT5G09510	116.595	112	4
RPS12A	433.07	37	4
AT5G02960	290.489	130	4
At5g47320	1274.79	96	4
AT3G57490	792.482	108	4
RIG	116.595	112	4
AT5G09500	0.271036	33	4
AT2G07696.1	106.338	104	4
ATPH	2313.73	81	2
EMB3137	4364.98	137	4
AtCg00380	1611.39	109	4
AT1G59359.1	781.636	106	4
AT1G58983.1	781.636	106	4
AT5G63070	0.271036	33	4
AT3G09680	290.489	130	4
RPS8	5004.07	64	2
AT4G30800	123.426	111	4
AT1G33850	0.271036	33	4
AT5G10730	3.36047	16	2
AT5G15910	3.36047	16	2
PCB2	182.075	24	2
AT4G31530	3.36047	16	2
AT4G18810	3.36047	16	2
AT1G32220	3.36047	17	2
Tic62	505.277	28	2
PTAC16	67.6434	18	2
AT2G37660	3.36047	17	2
HCF173	3.36047	17	2
PSI-P	1249.89	75	2
CSY2	76.8602	15	1
CSY3	68.9023	14	1
LHCA3	341.291	57	2
PSAN	358.89	62	2
PSAO	279.653	55	2
PSAK	447.283	63	2
PSAG	377.598	62	2
AT3G03100	96.8543	34	2
At5g67590	131.853	40	2
NAD4	259.678	42	2
EMB1467	257.887	46	2
AT3G28710	0.407649	13	2
NAD9	1494.7	67	2
AT3G18410	109.686	35	2
AT3G28715	0.575481	14	2
AT3G58730	0.575481	14	2
AT4G02580	1129.81	58	2
AT5G11770	661.817	52	2
AT2G02050	4.52105	16	2
CIB22	29.233	21	2
AT4G02620	0.575481	14	2
VHA-A	169.258	18	2
AT3G42050	0.575481	14	2
PETA	513.436	60	2
AT2G20360	56.5625	28	2
CI51	308.734	46	2
LrgB	17.6737	12	2
PGLP1	500.392	46	2
At5g63510	262.6	4	12
PnsL2	4.31701	11	2
Lhca6	738.196	31	2
CA2	762.022	8	12
CA1	10504.7	23	2
CYN	0	2	12
CSP41A	1417.68	53	2
GAMMACA3	262.6	5	12
GAMMACA2	263.55	7	12
GAMMACA1	262.6	5	12
RBCS3B	44683.7	12	2
GAMMACAL2	262.8	6	12
PnsB1	335.839	35	2
PnsB2	129.024	10	2
RBCS1B	613.635	17	2
RBCS2B	468.804	15	2
RBCS1A	1694.61	30	2
RBCL	14431.9	66	2
GDH3	190.911	35	1
PBD2	123.736	69	14
RCA	123886	135	2
AT1G53790	462.304	71	14
MEE34	3003.48	82	14
AT1G51720	190.911	35	1
RPT2b	729.91	87	14
RPN8A	497.928	80	14
AT1G53780	729.642	86	14
EMB2107	322.403	82	14
AT1G75990	318.477	79	14
PBF1	322.403	82	14
RPT6A	322.403	82	14
RPT5B	389.269	83	14
PAF1	322.403	82	14
PAE2	322.403	82	14
RPN5B	322.403	82	14
RPT1A	729.642	86	14
AT5G20000	322.403	82	14
AT4G15165	322.403	82	14
PAC1	322.403	82	14
PAE1	322.403	82	14
RPT3	1592.11	83	14
PAF2	322.403	82	14
PAG1	322.403	82	14
PBD1	389.269	83	14
AT4G24820	9747.62	87	14
EMB2719	318.477	79	14
RPT5A	553.789	85	14
NTRC	59561.5	115	1
AT5G19370	464.662	22	3
AT4G25370	1.22284	12	3
Hsp81.4	710.844	31	3
HSP81-3	710.614	30	3
HSP81-2	706.325	28	3
AT4G32208	50.0673	33	3
AT3G08740	131.608	14	3
CR88	730.964	31	3
Hsp89.1	814.118	31	3
MGE1	397.785	76	3
AT1G36390	4141.67	78	3
HSP70	17568.3	115	3
HSP90.1	645.252	27	3
mtHsc70-1	2658.32	72	3
AR192	405.709	77	3
cpHsc70-2	4852.4	72	3
cpHsc70-1	4844.53	72	3
EMB1241	10899	80	3
MTHSC70-2	2292.14	77	3
FAB1C	15.3773	19	3
FAB1A	15.3773	19	3
FAB1B	15.3773	19	3
AT1G67760	4.92441	17	3
HSP60-2	354.141	24	3
CPN60A	1033.71	27	3
HSP60	351.69	48	3
CPN60B	1302.18	26	3
Cpn60beta2	15.4249	22	3
Cpn60beta3	15.3773	19	3
TCP-1	1547.6	35	3
AT3G11830	310.685	26	3
AT5G26360	27.7036	25	3
AT5G20890	958.183	28	3
AT3G18190	583.319	26	3
HSP60-3A	15.4536	22	3
RPL12-C	1266.48	83	2
RPL18	0.0823971	55	4
AT4G13170	28.3806	105	4
AT5G52650	234.102	93	4
AT3G13120	15905	146	4
EMB3007	15.3773	19	3
CPN20	15779	59	3
AT5G27850	0.0823971	55	4
AT1G71500	150.388	40	2
AT3G47070	2.3913	20	2
PSBO2	1832.82	80	2
AT4G08876	30.5112	27	1
GGAT1	306.661	24	1
GOX2	3295.81	21	1
PSAH2	1087.66	67	2
PSAE-1	582.19	67	2
RPT2a	729.91	87	14
APE2	378.274	64	2
AT4G02530	1805.47	63	2
FdC2	2285.86	35	2
TROL	2.29292	19	2
FD2	737.313	45	2
DRT112	805.402	65	2
PnsL1	18.5628	24	2
AT5G03430	396.172	12	6
PnsB3	687.754	23	2
PRXQ	17045	100	1
FdC1	2471.59	34	2
PSBP-1	2393.16	87	2
APR3	396.172	14	6
TRXF1	3391.35	71	1
FNR1	9482.8	66	2
NIR1	2167.14	27	1
SIR	1407.49	21	6
APR2	402.894	15	6
APR1	396.172	14	6
APK	85.3122	14	6
AKN2	85.3122	14	6
OASB	379.337	9	1
SERAT2;2	1.31933	2	1
APK4	85.3122	14	6
APK3	85.3122	14	6
PSBQA	2554.18	82	2
FBA6	7.66775	33	1
AT3G52990	379.018	45	1
AT1G22170	86.8944	61	1
LHCA2	399.455	60	2
LHCB4.1	593.858	62	2
CP12-2	0	2	1
PSAA	783.574	63	2
LHCA1	468.651	59	2
PSAD-1	856.29	68	2
PSAE-2	127.374	54	2
PSAF	1236.74	72	2
PSAL	404.854	62	2
NADP-ME2	111.046	29	1
CSY5	16.2838	13	1
CSY1	16.2838	13	1
FUM1	0	9	1
iPGAM2	67.3949	44	1
ATCS	60.8664	17	1
CPSUFE	1.83333	5	1
AT5G09830	1	4	1
iPGAM1	69.9462	46	1
TPR10	20108.1	26	1
AT5G17560	0.333333	4	1
XTH24	0.333333	3	4
AT4G24780	0.333333	3	4
AT3G07010	1.16667	4	4
ELF3	0	2	4
GER3	9195.53	12	4
AT2G10940	1306.14	4	4
AT2G17360	311.659	124	4
AT2G21580	11.9199	50	4
AT3G61111	0.0638298	48	4
RPSAb	11.9199	50	4
RPS13A	498.915	126	4
AT3G02560	11.9199	50	4
EMB3010	11.9199	50	4
rps15ae	11.856	49	4
AT2G45710	0.0638298	48	4
AT5G27700	0.0638298	48	4
AT3G02080	11.9199	50	4
rps15ab	11.856	49	4
AT3G53890	290.672	122	4
AT4G34670	1629.91	125	4
AT1G34030	2.42235	49	4
AT2G39590	11.856	49	4
RS27A	2.42235	49	4
AT4G39200	2.42235	49	4
RPS15AD	764.768	128	4
AT3G56340	0.0638298	48	4
RPS18C	2.42235	49	4
AT3G60770	379.755	125	4
AT5G47930	0.0638298	48	4
AT2G19750	0.0638298	48	4
PFL	2.42235	49	4
AT5G59850.1	11.856	47	4
GAD5	44.9793	29	1
GAD3	44.9793	29	1
AGT3	27.1157	22	1
ALDH12A1	0.975307	26	1
GAD	44.9793	29	1
GAD4	44.9793	29	1
At3g24170	5129.25	65	1
AGT2	27.1157	22	1
PYD4	34.0866	23	1
AT2G24580	0	16	1
THA2	15.2965	18	1
DUT1	0	7	1
PCNA1	3527.4	64	10
AT2G21550	38967.3	64	1
AT5G65750	20.7796	20	1
PCNA2	3230.7	58	10
AT3G55410	23.0243	21	1
MCM5	581.984	46	10
MCM4	744.658	46	10
AT2G42220	4.12293	17	2
CH1	0	5	2
CAB3	3.50191	33	2
LHB1B1	0.242366	33	2
AT1G51400	19.2308	42	2
PSBR	55.1912	38	2
LHCB4.2	161.598	55	2
PSBTN	123.178	52	2
PSBQ-2	599.926	63	2
PSBY	177.688	55	2
LHCB6	507.064	57	2
PSAH-1	109.749	50	2
LHCB3	707.308	61	2
PSBX	88.6022	48	2
CP29	0.23185	12	2
PSBW	317.728	44	2
PSBO1	2060.68	75	2
LHCA4	108.058	49	2
CRD1	419.856	47	2
PSBA	574.557	57	2
PSBD	265.381	51	2
AT5G59610	23.3049	22	3
ARL2	5.45374	20	3
ARG1	5.45374	20	3
AT2G33735	20.9958	22	3
HSP91	431.707	50	3
AT5G49060	31.4357	24	3
AT1G11660	431.707	50	3
AT1G56300	14.5023	22	3
NdhT	6.4063	29	3
ATJ1	5.49721	22	3
AT3G17830	5.45374	23	3
AT3G11450	0	6	3
GFA2	5.50361	22	3
AT1G71000	14.8647	22	3
AT1G80030	5.45374	22	3
AT2G22360	5.50162	22	3
AT2G41000	100.197	23	3
AT5G06110	0	8	3
AT4G39960	5.45374	21	3
Hsp70-15	441.313	52	3
AT2G17880	19.4851	25	3
AT2G20550	77.1848	36	3
AT1G11040	122.831	39	3
TPR16	5.45374	20	3
TPR15	5.45374	20	3
AT1G44160	49.3412	34	3
J3	64.0326	27	3
J20	17.966	25	3
AT3G47940	49.3412	34	3
AT1G10350	38.8001	33	3
HSP70-18	4885.91	84	3
AT1G59725	38.8001	33	3
AT5G25530	49.3412	34	3
ATERDJ3B	13.0663	21	3
BIP1	151.733	42	3
AT3G08910	38.8001	33	3
J2	64.2059	28	3
SGT1A	0	3	3
AT5G01390	38.8001	33	3
SGT1B	13582.3	10	11
Hsp70-2	6563.74	86	3
AT2G05720	0	32	3
AT3G55930	0	32	3
Hop2	2.96206	21	3
Hsp70b	4940.04	85	3
Hop3	1.87749	19	3
U2A	0	32	3
AT2G44200	0	32	3
AT4G38780	0	32	3
AT4G16660	821.782	56	3
HSC70-1	7019.87	87	3
AT4G38760	0	2	3
AT3G09440	6581.44	87	3
AT1G28060	0	32	3
emb1644	0	32	3
SAD1	0	32	3
EMB2769	0	32	3
AT4G21110	0	32	3
emb1220	0	32	3
DOT2	0	32	3
LIS	0	32	3
EMB2770	0	32	3
Hop1	2.33761	18	3
AT1G23100	8.64192	12	3
AT2G20560	168.942	37	3
AT3G60210	8.64192	12	3
CHL-CPN10	9.19654	14	3
EMB3142	0	2	3
CPN10	9.98348	16	3
AT3G18790	0	32	3
EMB3011	0	32	3
AT4G28480	167.511	38	3
AT3G49601	0	32	3
SKIP	0	32	3
CDC5	0	32	3
PRL1	0	32	3
EMB2765	0	32	3
AT1G10580	0	32	3
At1g80070	0	32	3
AT5G28740	0	32	3
MAC3B	0	32	3
MOS4	0	32	3
PI4KA1	202.654	10	10
PARP2	1.42078	8	10
APTX	0.201923	8	10
AT3G54630	60.7352	12	10
AT1G34380	87.2677	7	1
AT3G52050	87.2677	7	1
AT2G02550	672.238	15	10
RAD5	5.34291	12	10
ATXRCC1	1.80623	11	10
AT5G22470	11.9968	21	10
PARP1	24.4649	25	10
AT5G05130	3.42792	7	10
AT3G14890	3.49994	10	10
AT3G48900	663.555	33	10
LIG6	33196.5	65	10
ATR	4672.41	41	10
ATRAD17	30.4622	31	10
UVH3	1135.18	25	10
AT1G18090	672.039	15	10
AT1G10520	15.7045	21	10
AT1G29630	826.189	18	10
ATM	54.6539	27	10
MCM9	809.359	41	10
AT4G36080	468.964	11	10
AT5G26680	2232.11	37	10
POLD2	4.5057	25	10
CFIM-25	1.27799	17	5
PK1	2.01982	8	10
REV1	3.97844	18	10
AT3G66652	1.27799	17	5
AT2G17930	463.19	10	10
AT5G43620	0.138095	15	5
TIL1	1013.82	45	10
EMB2780	1287.72	41	10
ATG6	1.87696	7	10
AT1G66500	0.138095	15	5
RNR2A	43.2176	19	10
RAPTOR1	1.87696	7	10
RPA70B	1811.44	53	10
RNR1	381.754	34	10
TSO2	43.6355	21	10
TOR	746.055	13	10
RAPTOR2	1.87696	7	10
AT4G25550	0.138095	15	5
MCM2	811.631	43	10
PAPS2	836.424	11	5
ORC3	0.0243902	23	10
EMB2775	53.5889	45	10
POLH	6.00251	20	10
VPS34	1355.18	14	10
VPS15	1.87696	7	10
RFC2	31.1936	38	10
KU70	109.287	36	10
RPA2	2065.35	52	10
RPA70D	1814.98	54	10
CDC45	474.499	33	10
MCM3	439.641	43	10
KU80	33.0807	28	10
ATLIG4	3147.66	21	10
NBS1	0.906395	10	10
POLA2	483.725	40	10
EMB1968	1878.35	53	10
EMB2810	1477.86	45	10
PAPS3	1920.66	16	5
CPSF160	1921.8	18	5
AT5G60940	0.138095	15	5
ETG1	0.0660569	15	10
nPAP	1053.33	12	5
AT5G10350	1.1399	16	5
ORC5	1.86098	25	10
AT5G65260	0.44697	15	5
TIL2	686.379	39	10
DPB2	298.521	30	10
RAD50	24.8609	26	10
MRE11	78.4681	32	10
CPSF30	1518.86	16	5
PRL	728.756	44	10
MCM6	434.335	41	10
CDC6	566.748	34	10
ORC1A	1.53392	28	10
CPSF73-I	1.27799	17	5
CPSF100	1.27799	17	5
ORC2	5.39002	27	10
ORC1B	131.982	31	10
REV7	0.0993506	16	10
REV3	1404	39	10
POLA3	483.975	41	10
ICU2	1365.76	48	10
CSTF64	1921.8	18	5
FIP1[V]	1921.8	18	5
VSP1	0.142857	4	11
PLA2-ALPHA	687.375	12	11
PEPKR1	0	9	11
PEPKR2	0	9	11
LOX5	9.75758	12	11
PPCK2	0	9	11
DOX1	0	8	11
VSP2	97.1735	6	11
LOX1	5224.95	15	11
DAD1	546.589	10	11
DGK4	0.666667	8	11
AT2G45670	0.666667	5	11
MGD2	0.25	9	11
HPL1	0	5	11
ARD1	0	4	7
ATARD2	0	4	7
JAR1	665.882	8	11
NPR1	13730	7	11
PDF1.2	917.945	7	11
ARD4	0	4	7
ZIM	3.38262	11	11
LOX6	239.798	16	11
OPR2	2.5	5	11
At1g32200	2.33333	7	11
CLH1	37631.5	6	11
SDP1-LIKE	7220.96	22	11
CORI3	22223.7	18	7
LOX4	900.854	21	11
PAH2	0.666667	9	11
SDP1	7220.96	22	11
LOX3	1193.06	23	11
PAH1	0.666667	9	11
AOC2	206.071	4	11
AOC3	316.846	9	11
NOL	0	3	11
AOC1	206.071	4	11
PD1	0	3	7
AT3G44830	0.916667	10	11
NYC1	0	3	11
ADT4	0	4	7
ADT5	0	4	7
AT5G34930	4.66667	8	7
OPCL1	392.285	10	11
OPR3	820.011	20	11
LOX2	47676.4	29	11
AOS	9639	25	11
AT1G15710	4.66667	8	7
ADT2	0	3	7
TAG1	1.25	10	11
DGAT2	1.25	10	11
PDAT	1.25	10	11
JAZ11	56.0059	9	11
JAZ4	56.4098	10	11
SKP1	7114.1	8	11
CUL1	3594.01	7	11
TIFY7	68.6261	14	11
JAZ12	55.9059	8	11
JAZ1	2921.92	20	11
JAZ6	56.5475	11	11
MYC2	2890	22	11
COI1	39866	23	11
JAZ3	68.6261	14	11
JAZ10	138.379	16	11
JAZ8	1.04444	11	11
TIFY10B	911.306	16	11
PHT3;2	0.190832	12	2
PHT3;3	0.190832	12	2
PHT3;1	0.190832	14	2
PCLPP	103.273	51	2
MATK	74.3693	45	2
PETG	49.4704	34	2
NRPB2	0	6	2
PSBF	408.574	51	2
NAD1B	59.1244	33	2
NRPC2	0	6	2
RPOC1	1174.84	55	2
NRPD2B	0	7	2
NRPD2A	0	7	2
RPOC2	1024.98	52	2
RPOB	3093.88	56	2
RPOA	2425.97	54	2
NDHF	514.683	66	2
NDHH	1732.39	80	2
NDHG	253.555	60	2
NDHA	341.601	64	2
NDHD	460.112	69	2
NDHI	517.638	56	2
NDHJ	1335.04	71	2
NDHE	353.099	62	2
AtCg00800	5305.35	111	2
PSBG	784.402	69	2
NDHC	523.814	67	2
AT3G17770	0	9	1
DIN9	7.27078	29	1
HXK3	30.4817	44	1
AT1G66430	2.53413	25	1
ATHXK4	30.4817	44	1
HKL1	31.2888	45	1
MEE31	7.27078	29	1
AT5G04120	13.2001	34	1
NADP-ME4	1.48458	19	1
HKL3	30.4817	44	1
AT4G17260	44.1544	39	1
NAD-ME2	17.9912	24	1
NAD-ME1	17.9912	24	1
AT3G50520	13.2001	34	1
AT5G22620	56.3698	39	1
PPC2	316.917	35	1
ORF110A	28.0138	5	2
AT2G07732	28.0138	5	2
PDE334	319.604	38	2
AT1G80380	137.132	14	2
AT2G01460	0	6	1
UPP	148.963	8	1
UKL5	367.394	14	1
UKL3	367.394	14	1
UKL4	315.101	13	1
UKL2	315.101	13	1
URH1	0	6	1
UK/UPRT1	315.101	13	1
TRX1	332.741	27	1
ROC4	104.12	29	1
PSB28	94.1693	26	2
TRX2	287.497	27	1
LQY1	30.7361	20	2
FKBP13	6.4642	13	2
TRX3	453.602	29	1
HCF164	198.023	28	1
PSRP3/1	287.958	41	2
AT2G43560	451.829	40	2
PRPS20	120.346	37	2
CYP38	616.33	44	2
PPL1	1428.86	58	2
CDSP32	367.801	30	1
AT3G52960	263.921	44	1
PER1	420.164	55	1
ATHM2	120.396	28	1
TRX-M4	432.128	34	1
emb2184	736.4	51	2
PRPL35	205.215	41	2
At5g06290	3953.23	72	1
AT3G11630	3548.44	65	1
AT5G47190	754.906	53	2
RPS17	2969.33	126	4
AT1G64880	822.071	119	4
emb2726	9245.51	128	4
rps2	311.548	37	2
At3g03600	355.536	38	2
AT1G77750	171.697	123	4
AT1G21500	5.14729	15	2
LHCB2.3	12.0056	18	2
AT1G52220	12.444	28	2
PETE1	193.6	47	2
PSAJ	72.7141	31	2
AT1G74470	15.4897	25	2
AT1G49140	2.92261	10	2
YCF4	37.0029	46	2
NdhL	6.05402	5	2
NdhN	9.25075	5	2
LTO1	0	3	2
CAB1	4.94287	26	2
AT4G01150	19.3663	35	2
AT4G11120	1.81474	45	4
RABE1b	3.5412	79	4
AT3G18880	13.0111	96	4
AT5G15750	13.0088	98	4
AtMg00090	13.0335	96	4
AT3G45030	14.6621	98	4
AT1G80750	12.8077	98	4
AT3G43980	13.0326	96	4
SAG24	10.632	97	4
AT3G43980.1	13.0326	96	4
emb1129	13.0111	96	4
AT1G58684	14.462	93	4
AT5G39850	13.0088	98	4
NFD3	12.3596	95	4
AT4G33865.1	13.0326	96	4
AT5G62300.1	14.6621	98	4
rps14	13.0326	96	4
PGLP2	0	5	2
RbcX2	171.88	4	2
AT5G36790	0	5	2
RPS16	2.61151	38	2
YCF5	8.31004	44	2
PSAI	8.87228	45	2
YCF3	3.38131	43	2
CAC2	41.6979	4	2
PSBL	2.63733	38	2
NRPD1B	0	3	2
CAC3	61.0834	5	1
ACCD	409.626	47	2
AT1G79010	142.756	27	2
PSBK	191.42	50	2
PSBI	234.027	49	2
NAD1A	3.47909	24	2
NAD2B	2.09815	24	2
NAD7	955.315	37	2
NAD2A	2.09815	23	2
NDHB.2	2.09815	23	2
NDHB.1	2.09815	23	2
AT2G07785	3.47909	24	2
NAD1C	3.47909	24	2
AT2G07689	2.09815	24	2
AT3G48420	988.868	28	2
PMDH1	8.56799	8	1
MDH	34.3098	9	1
c-NAD-MDH2	2.10137	7	1
PPDK	57.8474	14	1
AUX1	165.537	12	11
IAA12	45.9626	10	11
IAA14	0.111111	9	11
AXR3	0.222222	10	11
IAA7	135.178	11	11
IAA19	0.222222	10	11
IAA5	0.222222	10	11
IAA1	0.111111	9	11
TIR1	12470.3	14	11
IAA28	0.222222	10	11
UBQ12	23.0766	77	14
UBQ4	23.0766	77	14
UBQ9	23.0766	77	14
UBQ8	23.0766	77	14
UBQ13	23.0766	77	14
UBQ7	23.0766	77	14
UBQ10	23.0766	77	14
RUB1	23.0766	77	14
BRCC36A	808.693	78	14
BRCC36B	808.693	78	14
RAD23B	0.215837	24	14
AT5G16090	1.87069	27	14
AT5G38650.1	54.9314	41	14
AT1G62920	54.9314	41	14
RAD23C	2.0489	28	14
RAD23D	3.39508	32	14
AT1G67250	54.9314	41	14
UBQ3	1293.23	80	14
UBQ6	16.593	72	14
AT5G57950	317.793	75	14
UCH1	55.0619	64	14
PA200	322.134	81	14
UCH2	55.1088	66	14
FZR2	1.83452	8	14
UVI4-LIKE	0	4	14
CCS52A2	1.96786	8	14
AT2G03430	317.987	77	14
FUS6	8.58625	17	14
KRP2	2.05716	4	14
CYC1BAT	3.55377	9	14
APC8	114.39	72	14
E2F1	2.0346	7	14
E2F3	0.871316	6	14
DPB	0.2	5	14
CYCD3;3	0.659596	4	14
CYCA3;4	171.841	75	14
CDC2	227.075	76	14
RPN1B	723.417	84	14
RPN1A	723.417	84	14
PRC3	322.403	82	14
RPN12a	384.998	80	14
PBE1	57.3294	68	14
AT2G32730	318.477	79	14
AT4G08140	723.417	84	14
AT4G19006	948.213	80	14
RPT4A	5.89498	80	14
UBP6	55.0619	64	14
UBP7	55.0619	64	14
AT5G23540	1318.23	84	14
At2g05840	322.403	82	14
PBC2	322.403	82	14
AT3G26340	322.403	82	14
RPN13	630.008	80	14
RPN12b	318.477	79	14
AT1G45000	31.7112	81	14
PBG1	322.403	82	14
AT5G45620	482.164	81	14
PAD2	322.403	82	14
RPN10	723.417	84	14
PBB2	322.403	82	14
PBC1	322.403	82	14
AT1G79210	322.403	82	14
ATS9	913.219	81	14
PBB1	322.403	82	14
PBA1	322.403	82	14
PAD1	322.403	82	14
AT1G73110	2.50047	66	14
At5g35590	322.403	82	14
AT3G61870	11.0856	24	2
Lhca5	4.1181	14	2
AT1G56500	49.4976	18	1
PCK1	65.8613	13	1
PCK2	65.8613	13	1
SR	0	9	1
OMR1	13.1477	14	1
PUR7	44.2202	7	1
AT4G02610	61.466	12	1
TSB2	61.466	12	1
PUR5	0.142857	7	1
AT5G28237	61.466	12	1
TSA2	61.466	12	1
TSB1	61.466	12	1
PRXIIC	188.161	36	1
PMSR1	1	3	1
AT5G26110	0	1	1
AT5G20500	3.33941	13	1
MRL7	0	5	1
AT1G60740	193.994	37	1
FSD3	1114.13	15	1
GRXC2	2.18221	10	1
TPX1	285.632	43	1
HAOX1	0	5	1
HAOX2	0	5	1
GPX2	48.4801	17	1
GOX1	0	5	1
NTRA	426.68	48	1
AT1G65990	239.522	39	1
NTRB	426.68	48	1
FLN2	0	5	1
PRXIIF	345.451	44	1
TH8	43.5974	21	1
WCRKC2	373.518	26	1
WCRKC1	372.047	23	1
TY1	31.4548	20	1
ty2	278.553	21	1
ACHT1	64.8703	23	1
TH7	43.5974	21	1
TH9	140.161	24	1
ACHT3	371.547	23	1
AT3G56420	43.5974	21	1
AT3G62510	13.4164	15	1
CXXS2	43.5974	21	1
TO1	43.5974	21	1
ACHT5	43.5974	21	1
ACHT2	43.6409	23	1
ACHT4	371.547	23	1
TRXF2	47.6358	24	1
CAT	9032.5	28	1
AT5G18400	0	1	1
AT5G18362	0	2	1
CcdA	3.05211	12	1
AT3G04780	1346.15	9	1
AT5G06430	0	1	1
CITRX	4877.94	38	1
FLN1	0	5	1
ATHM3	79.916	29	1
THX	102.048	23	1
TPS1	2.81352	5	1
At1g60140	2.81352	5	1
TPS8	2.81352	5	1
AT1G67700	13.303	13	2
HCF136	97.7315	26	2
PORC	40078.2	24	2
AT1G22850	0.470656	3	1
SLP1	0	1	2
PSAD-2	250.517	60	2
emb2394	1101.12	56	2
THM1	970.925	48	1
c-NAD-MDH1	780.551	40	1
PKT4	394.794	13	9
At1g01090	1235.85	57	1
F2KP	139.445	14	1
AT1G06020	2.53413	25	1
AT1G48430	0	9	1
E1-BETA-1	38.2928	16	1
AT1G15120	5.37275	19	2
emb2386	190.205	118	4
THA1	15.2965	18	1
PSP	0	9	1
AT1G21350	343.063	22	1
AVP1	0.550805	25	2
PPa1	0.550805	26	2
RbcX1	72.4701	3	2
APX1	2396.33	13	1
AT1G16700	142.756	27	2
HSFA1D	0	24	3
AT3G58390	0	2	4
AT5G22480	0	1	4
AT5G37340	0	1	4
AT1G24510	839.446	27	3
PUR2	126.843	12	1
CXXS1	43.5974	21	1
TO2	43.5974	21	1
F5M15.5	847.886	17	1
ATTRX4	47.3504	22	1
CAT1	1639.47	21	1
TRX5	8588.28	24	1
AT1G01880	297.687	21	10
AT1G07270	617.632	36	10
GSR2	0	4	1
FD1	0.047619	4	1
AT2G04400	0	7	1
AT1G17860	7	3	13
AT2G18370	1	2	13
SWI3C	0.858333	9	8
PP5.2	0.658333	8	8
MET3-1	153.954	15	6
RDH2	0	2	6
CCMH	0	1	2
AT1G55805	0	2	1
CPNIFS	79.0656	6	1
NF-YC11	0	1	1
AT1G08120	0	1	1
FAB1D	15.3773	19	3
Cpn60beta4	472.369	20	3
AT2G41620	2632	4	3
BIP3	145.462	40	3
AT1G04190	39.73	17	3
ACLA-3	0	5	2
NRPA2	2.84316	10	2
AT1G14450	0.95	5	12
CHIP	921.887	2	3
AT1G04810	318.477	79	14
RAD23A	0.215837	23	14
FUS5	0.83575	20	14
CDKB2;2	1.49396	6	14
KRP4	0.371795	3	14
SRX	0	4	1
MGL	1	4	1
MAC3A	0	32	3
FSD1	0	1	3
AT1G09750	1.16667	4	4
At1g72610	0.333333	3	4
AT3G09620	0	1	4
AT2G03420	0	1	4
LTL1	17.9182	2	4
GASA4	0	1	4
CSTF77	1921.8	18	5
TAFII21	0.211111	3	10
AAPT1	2.91667	8	11
PPCK1	0	9	11
ARD3	0	4	7
AOC4	206.071	4	11
GPAT1	0	3	11
HCAR	0	3	11
MTO3	0	1	7
SAM1	0	1	7
SAM-2	0	1	7
MAT3	0	1	7
PDS1	0	1	7
ADT6	0	3	7
ADT1	0	3	7
JAZ5	348.209	15	11
NRPD1A	0	3	2
NRPB1	0	2	2
SHY2	0.222222	10	11
PRIN2	0	5	1
AT1G07700	0.177866	4	1

## Sheet: Means
Property	Mean
Betweenness	1748.55
Node degree	42.02
