# Supplementary material for: Protein Level Defense Responses of Theobroma cacao Interaction With Phytophthora palmivora
Source: Frontiers journal article supplement (doi:10.3389/fagro.2022.836360), 2022-02-10
Supplement: Table_6.XLSX [file Table_6.XLSX]

## Sheet: Node properties
Supplemental Table S6 Node properties of the Arabidopsis thaliana protein network homologous to those identified as differentially accumulated in leaf discs of the cacao SIC23 genotype. a Protein identification number as in STRING database. b Betweenness values; c Node degree values and d Number of cluster of the correspondent protein as calculated with the package igraph in Rstudio software.
Nodes with an betweenness value above the average (2594.92) are called a bottleneck. Nodes with a node degree value above the average (37.11) are called hubs.
Protein IDa	Betweennessb	Node Degreec	Clusterd
4CL3	443.607	9	10
AAO3	0	2	2
AAPT1	2.91667	8	3
ABA2	2941.1	12	2
ACC1	25676.1	80	2
ACC2	21661.6	76	2
ACCD	983.985	47	1
ACLA-1	280.935	61	2
ACLA-2	280.935	61	2
ACLA-3	280.935	61	2
ACLB-1	17635.3	118	2
ACLB-2	17370.1	117	2
ACO	37.0764	26	2
ACO3	22.7525	27	2
ACS	235.589	16	2
ACS5	0	6	3
ACS9	0	6	3
ACT12	136.619	6	4
ADG1	0	8	2
ADH1	186924	31	2
ADT1	0	3	8
ADT2	0	3	8
ADT4	0	4	8
ADT5	0	4	8
ADT6	0	3	8
AGT	5106.93	49	2
AGT2	4974.9	50	2
AGT3	4493.53	48	2
AHP1	0.396825	5	3
AHP3	0.396825	5	3
AHP5	1723.21	6	3
AIM1	0.111111	5	3
AKHSDH1	877.784	12	2
AKHSDH2	1569.97	15	2
AKN2	74.6351	14	2
AlaAT1	1162.13	11	2
ALB1	0	4	1
ALDH10A8	582.065	9	2
ALDH10A9	111.796	11	2
ALDH11A3	999.579	64	2
ALDH12A1	1457.6	27	2
ALDH2B4	3580.26	20	2
ALDH2B7	4081.08	21	2
ALDH2C4	3421.77	12	2
ALDH3F1	5378.54	23	2
ALDH3H1	5554.07	24	2
ALDH3I1	5378.54	23	2
ALDH5F1	30057.3	44	2
ALDH7B4	8352.97	30	2
AOAT2	6614.32	73	2
AOC1	220.669	4	3
AOC2	220.669	4	3
AOC3	445.677	9	3
AOC4	220.669	4	3
AOS	53512.3	25	3
AOX2	0	1	1
AP2	2.25	6	3
APC10	3.2506	12	4
APC4	34906.1	13	4
APC6	3.2506	12	4
APC8	81114	71	4
APD3	0	7	6
APD4	0	7	6
APE2	603.105	64	1
APK	74.6351	14	2
APK3	74.6351	14	2
APK4	74.6351	14	2
APL1	24.1827	9	2
APL2	0	8	2
APL3	17.75	8	2
APL4	0	7	2
APR1	448.881	14	2
APR2	455.604	15	2
APR3	448.881	14	2
APS1	194.014	15	2
APS3	194.014	15	2
APS4	194.014	15	2
APTX	0.201923	8	11
APX1	1804.08	6	2
APX2	0.328904	2	1
APX3	0.328904	2	1
APX5	0.328904	2	1
APX6	0.328904	2	1
AR192	1221.5	83	13
ARD1	0	4	8
ARD3	0	4	8
ARD4	0	4	8
ARG1	3.57991	20	13
ARK2	11875.1	8	4
ARK3	2.4835	6	4
ARL2	3.57991	20	13
ASG2	0	2	6
ASP1	14.4737	42	2
ASP2	46.8159	48	2
ASP3	24.264	46	2
ASP4	24.264	46	2
ASP5	35.0249	43	2
At1g01090	1057.86	65	2
AT1G01880	322.818	21	11
AT1G03270	0	3	2
AT1G04190	6.72438	17	13
AT1G04810	1519.9	68	7
AT1G07270	659.627	36	11
AT1G07920	1.1702	23	5
AT1G07930.1	1.35163	24	5
At1g07940	541.412	30	5
AT1G08360	146.318	107	5
AT1G09130	67.0897	7	13
AT1G09640	788.92	40	5
AT1G10350	50.735	41	13
AT1G10520	22.8351	21	11
AT1G10580	0	32	13
AT1G11040	52.5422	39	13
AT1G11660	852.156	79	13
AT1G11860	40267.3	84	2
AT1G12000	431.361	52	2
AT1G12230	399.748	76	2
AT1G14450	0.95	5	14
AT1G14810	1215.4	9	2
AT1G15120	69.194	19	1
AT1G15710	4.66667	8	8
AT1G16350	653.125	22	2
AT1G16700	98.4525	27	1
AT1G17860	7	3	15
AT1G18090	718.754	15	11
AT1G18210	501.581	6	4
AT1G18270	661.134	60	2
AT1G20950	433.976	53	2
AT1G21400	25.8136	15	2
AT1G21500	6.82869	15	1
AT1G22170	56.4548	59	2
AT1G23100	232.706	36	13
AT1G24510	1839.02	50	13
AT1G26640	141.768	5	2
AT1G27400	159.311	106	5
AT1G28060	0	32	13
AT1G29630	883.52	18	11
AT1G30820	0	5	2
AT1G31220	74.1531	21	2
AT1G31910	0	6	9
At1g32200	2.33333	7	3
AT1G32220	2.96699	17	1
AT1G32250	978.91	8	4
AT1G32470	17293.3	83	2
AT1G33850	0.272406	33	5
AT1G34380	93.3354	7	2
AT1G36390	1930.11	84	13
AT1G44160	29.6117	34	13
AT1G45000	9.33144	66	7
AT1G45015	12	5	15
AT1G45403	0	1	1
AT1G47271	5.46208	9	2
AT1G47330	0	3	2
AT1G48095	4.32907	16	13
AT1G48430	0	9	2
AT1G49140	18.022	10	1
At1g49670	476.299	14	2
AT1G51400	23.4594	42	1
AT1G51650	101.848	39	1
AT1G51720	773.412	64	2
AT1G51980	1317.54	39	1
AT1G52220	17.5636	28	1
AT1G52710	791.164	34	1
AT1G53780	1518.66	67	7
AT1G53790	61.0798	61	7
AT1G54220	650.019	58	2
At1g55510	77.2941	24	2
AT1G55930	0	3	2
AT1G56190	14.7056	55	2
AT1G56300	13.8128	22	13
AT1G57720	1743.28	41	5
AT1G58684	36.1478	93	5
AT1G58983.1	3299.5	106	5
AT1G59359.1	3299.5	106	5
AT1G59725	50.735	41	13
At1g59900	788.779	61	2
AT1G63290	333.626	19	2
AT1G63640	10.8574	5	4
AT1G63660	6660.23	49	2
AT1G64880	36.1478	94	5
AT1G65230	0.718875	16	1
AT1G66500	0.138095	15	6
AT1G67430	48.8859	105	5
AT1G67700	15.5994	13	1
AT1G68660	0.794509	9	13
AT1G69800	5.46208	10	2
AT1G70600	4.89917	48	5
AT1G71000	14.6835	22	13
AT1G71500	140.468	29	1
AT1G72070	4.87345	23	13
AT1G72550	1.75435	5	13
AT1G72810	0.24446	6	2
AT1G73110	0.163141	61	7
AT1G73510	0	8	6
AT1G74470	9233.25	43	1
AT1G75560	0.203391	8	6
AT1G75990	1519.9	68	7
AT1G76550	70.6651	51	2
AT1G76630	9.80953	10	6
AT1G77750	36.394	100	5
AT1G77930	2.15857	26	13
At1g78050	54.7788	56	2
AT1G79010	98.4525	27	1
AT1G79210	1519.9	68	7
AT1G79470	416.645	21	2
AT1G79870	24.2794	16	2
AT1G80030	8.86804	27	13
At1g80070	0	32	13
AT1G80230	946.254	39	1
AT1G80380	193.695	11	2
AT1G80470	1.74054	31	5
AT1G80750	34.5346	98	5
AT2G01250	143.766	105	5
AT2G01460	0	6	2
AT2G02050	4.61117	16	1
AT2G02550	718.953	15	11
AT2G03430	1517.49	66	7
At2g04660	3.2506	12	4
AT2G05720	0	32	13
At2g05840	1519.9	68	7
AT2G07689	2.17757	24	1
AT2G07696.1	271.635	104	5
AT2G07698	4990.74	52	1
AT2G07727.1	48.7026	27	1
AT2G07732	0.778068	5	1
AT2G07785	3.56714	24	1
AT2G09990	161.448	106	5
AT2G11270	224.223	49	2
AT2G12880	0.203391	8	6
AT2G14520	0	3	2
AT2G16510.1	721.43	30	1
AT2G17360	0.95262	95	5
AT2G17410	2694.52	8	6
AT2G17880	29.8534	30	13
AT2G17930	554.133	10	11
AT2G18110	1.6879	29	5
AT2G18370	1	2	15
AT2G18620	1065.75	37	9
AT2G19970	0	1	15
AT2G20360	48.6096	28	1
AT2G20420	450.466	47	2
AT2G20550	38.0688	36	13
AT2G20560	162.561	51	13
AT2G21550	57539	65	2
AT2G22360	7.54247	26	13
AT2G22720	0	2	6
AT2G24580	0	16	2
AT2G25610	730.802	41	1
AT2G31240	3257.43	12	4
AT2G31610	10734.9	141	5
AT2G32415	4199.62	18	6
AT2G32730	1519.9	68	7
AT2G33735	9.77961	22	13
AT2G34460	3.02581	18	1
AT2G34590	851.628	64	2
AT2G34890	0	5	2
AT2G35040	637.824	21	2
AT2G35120	77.3619	35	2
AT2G36160	48.4562	103	5
AT2G36500	5.46208	9	2
AT2G36580	1982.51	89	2
AT2G37190	50.9266	106	5
AT2G37500	12.6313	9	2
AT2G37660	2.96699	17	1
AT2G37690	30100.8	37	2
AT2G38660	126.402	21	2
AT2G39390	4.89917	48	5
AT2G40010	3.09216	37	5
AT2G41000	64.164	23	13
AT2G41620	2908	4	13
AT2G41840	3341.02	108	5
AT2G42220	4.39111	17	1
AT2G42710	0.4063	20	5
AT2G43030	477.623	24	5
AT2G44120	143.766	105	5
AT2G44200	0	32	13
AT2G45290	605.274	91	2
AT2G45620	4038.49	24	6
AT2G45670	0.666667	5	3
AT2G46040	0	6	6
AT2G46560	28.0436	9	6
AT3G01790	0.4563	21	5
AT3G01850	297.234	18	2
AT3G02530	4.51657	18	13
AT3G03100	314.703	34	1
AT3G03580	0.0454545	3	6
AT3G03960	4.32907	16	13
AT3G04050	412.178	62	2
AT3G04230	161.448	106	5
AT3G04840	683.373	105	5
AT3G07110	396.004	108	5
AT3G08740	268.743	17	13
AT3G08910	45.4051	40	13
AT3G09200	4713.03	131	5
AT3G09440	7094.59	116	13
AT3G09630	1163.51	126	5
AT3G09680	152.851	106	5
AT3G11250	1233.56	129	5
AT3G11450	0	6	13
AT3G11510	48.4562	103	5
AT3G11630	0	4	2
At3g11945	34.5878	22	9
AT3G12050	0.234374	8	13
AT3G12290	147.937	22	2
AT3G13070	0	3	2
AT3G13120	36.3529	97	5
AT3G13225	8.54091	3	6
AT3G13930	581.78	62	2
AT3G14510	1065.75	37	9
AT3G14530	1065.75	37	9
AT3G14890	3.49994	10	11
AT3G15640	836.033	37	1
AT3G17770	0	9	2
AT3G17830	6.01648	27	13
AT3G18190	1462.9	47	13
AT3G18410	338.725	35	1
AT3G18790	0	32	13
AT3G18880	34.7239	96	5
AT3G19480	6.81641	6	2
AT3G20160	1065.75	37	9
AT3G23940	25.8614	5	13
At3g24170	959.608	30	2
AT3G24530	2.52556	11	4
AT3G24830	145.806	106	5
AT3G25960	412.178	62	2
AT3G26340	1519.9	68	7
AT3G27240	1684.55	55	1
AT3G28155	2.88271	16	4
AT3G28710	0.407649	13	1
AT3G28715	0.575481	14	1
AT3G29320	332.306	18	2
AT3G29430	1065.75	37	9
AT3G32040	1065.75	37	9
AT3G42050	0.575481	14	1
AT3G42860	0.203391	8	6
AT3G43490	0.203391	8	6
AT3G43590	0.203391	8	6
AT3G43610	2.52556	12	4
AT3G43980	34.7461	96	5
AT3G43980.1	34.7461	96	5
AT3G44830	0.916667	10	3
AT3G45030	36.3529	98	5
AT3G46960	84.601	25	6
AT3G47370	36.3631	99	5
AT3G47940	55.778	42	13
AT3G48540	0	4	2
AT3G48900	717.993	33	11
AT3G48960	1.4484	34	5
AT3G49160	412.178	62	2
AT3G49601	0	32	13
AT3G49910	144.278	106	5
AT3G50520	24.2718	32	2
AT3G51190	1.35163	33	5
AT3G52050	93.3354	7	2
AT3G52580	48.4562	103	5
AT3G52730	43.1927	29	1
AT3G52950	5.46208	9	2
AT3G52990	238.459	41	2
AT3G53430	6.58263	99	5
AT3G53870	10673.5	140	5
AT3G53890	0.95262	95	5
AT3G53980	12	5	15
AT3G54210	482.331	25	5
AT3G54250	606.049	26	9
AT3G54630	72.9901	12	11
AT3G55410	961.853	64	2
AT3G55650	412.178	62	2
AT3G55810	412.178	62	2
AT3G55930	0	32	13
AT3G57370	0.333333	8	6
AT3G57380	0.333333	8	6
AT3G57490	3341.02	108	5
AT3G58140	539.029	21	13
AT3G58730	0.575481	14	1
AT3G60210	72.9789	35	13
AT3G60750	1590.41	94	2
AT3G60770	4.56753	96	5
AT3G60780	0	8	6
AT3G61690	1.2643	10	6
AT3G66652	38.0032	17	6
AT4G00600	173.754	23	2
AT4G01150	16.8167	35	1
AT4G01310	27164.1	120	5
AT4G02120	0	5	2
AT4G02530	45.3578	24	1
AT4G02580	1647.07	58	1
AT4G02620	0.575481	14	1
AT4G08140	1519.9	68	7
AT4G08640	4.32907	16	13
AT4G10450	326.519	109	5
AT4G10780	0.328904	2	1
AT4G11120	6.99263	45	5
AT4G13170	145.806	106	5
AT4G13780	379.365	20	13
AT4G14230	0	3	2
AT4G14240	0	3	2
AT4G14250	1.35163	31	5
AT4G15165	1519.9	68	7
AT4G16095	0.328904	2	1
AT4G16155	5422.55	64	2
AT4G16260	0	2	3
AT4G16660	1948.82	87	13
AT4G16720	92.3941	71	5
AT4G17260	16.8434	38	2
AT4G17360	0.281573	17	2
AT4G17390	1.9065	35	5
AT4G18810	2.96699	16	1
AT4G19006	1519.9	68	7
AT4G20320	0	5	2
AT4G21110	0	32	13
AT4G21903	0	2	6
AT4G24820	1519.9	68	7
AT4G25550	0.138095	15	6
At4g26090	0.328904	2	1
AT4G26390	412.178	62	2
AT4G26910	661.854	55	2
At4g26970	24.011	27	2
AT4G27190	0.328904	2	1
AT4G27220	0.328904	2	1
AT4G28480	189.98	53	13
AT4G29520	0	2	15
AT4G30800	263.684	105	5
AT4G31530	2.96699	16	1
AT4G32208	14.1595	33	13
AT4G32360	1.24613	10	2
AT4G32470	171.075	32	1
AT4G32480	0.0784314	4	2
AT4G32530	730.802	41	1
AT4G33070	3263.96	15	2
AT4G33150	0	3	2
AT4G33700	0	3	2
AT4G33865.1	34.7461	96	5
AT4G34670	0.95262	95	5
AT4G35295	127.506	6	2
AT4G36080	559.906	11	11
AT4G36130	1.35163	33	5
AT4G37480	2.15857	23	13
AT4G37830	1.15508	20	1
AT4G38760	0	2	13
AT4G38780	0	32	13
AT4G39280	0	4	13
AT4G39960	5.55957	25	13
AT5G01320	1775.7	9	2
AT5G01390	50.735	41	13
AT5G02870	3896.43	134	5
AT5G02960	152.851	106	5
AT5G03430	448.881	12	2
AT5G04120	28.8288	34	2
AT5G04800	0.95262	95	5
AT5G05130	11.0367	7	11
AT5G05400	0.328904	2	1
AT5G05960	1	2	15
AT5G06110	0	8	13
At5g06290	16.1723	5	2
AT5G07090	159.491	103	5
AT5G08240	0	8	6
AT5G08300	247.308	44	2
AT5G08570	833.819	68	2
AT5G08670	15800	70	1
AT5G08680	14576.5	69	1
AT5G08690	27389.8	83	1
AT5G09300	131.683	26	2
AT5G09490	0.272406	33	5
AT5G09500	0.272406	33	5
AT5G09510	151.838	106	5
AT5G10350	37.8652	16	6
AT5G10730	2.96699	16	1
AT5G10760	0	3	3
AT5G11770	607.678	52	1
AT5G12110	461.283	30	5
AT5G13430	2597.35	67	1
AT5G13440	2597.35	67	1
AT5G13900	0	1	15
AT5G14590	137.41	45	2
AT5G15200	141.628	105	5
AT5G15750	34.5825	98	5
AT5G15910	2.96699	16	1
AT5G16070	8.2735	19	13
AT5G17410	145.041	16	4
AT5G18380	0.531665	34	5
AT5G19510	1.93338	31	5
AT5G20000	1519.9	68	7
AT5G20290	1.9065	35	5
AT5G20890	1462.9	47	13
AT5G22440	537.47	109	5
AT5G22470	24.4413	21	11
AT5G22620	36.4329	35	2
AT5G23250	30.3975	34	2
AT5G23540	1876.01	69	7
AT5G23900	1.4484	34	5
AT5G23910	66.8239	17	4
AT5G25450	156.837	30	1
AT5G25530	61.1989	43	13
AT5G26360	1512.17	49	13
AT5G26680	2401.5	37	11
AT5G28237	17.9539	13	2
AT5G28740	0	32	13
AT5G34780	147.107	20	2
AT5G34930	4.66667	8	8
AT5G35450	0.328904	2	1
AT5G35530	10673.5	140	5
At5g35590	1519.9	68	7
AT5G35910	10272.7	27	6
AT5G36240	0.203391	8	6
AT5G36790	325.666	11	2
AT5G37380	2.15857	21	13
AT5G37590	3257.43	12	4
AT5G39850	34.5825	98	5
AT5G40810	1684.55	55	1
AT5G41310	4.78413	3	4
AT5G42740	6954.94	91	2
AT5G43620	0.138095	15	6
AT5G43640	0.272406	33	5
AT5G43730	0.328904	2	1
AT5G43740	0.328904	2	1
AT5G44520	28.8802	14	2
AT5G45620	1519.9	68	7
AT5G47030	954.985	63	1
AT5G47250	0.328904	2	1
AT5G47260	0.328904	2	1
At5g47320	0.272406	27	5
AT5G47435	0.281573	17	2
AT5G48620	0.328904	2	1
AT5G49060	14.2615	24	13
AT5G50530	5.46208	9	2
AT5G52380	0.203391	8	6
AT5G52790	0	3	2
AT5G53080	3257.43	12	4
AT5G53150	2.15857	21	13
AT5G55070	639.402	53	2
AT5G56350	698.806	69	2
AT5G57950	1517.49	66	7
AT5G58330	5495.34	67	2
AT5G58420	40.7144	102	5
AT5G58784	0	16	9
AT5G59240	1.4484	34	5
AT5G59610	9.23511	22	13
AT5G60670	6.58263	99	5
AT5G60940	0.138095	15	6
AT5G61510	7.92997	3	2
AT5G62300.1	36.3529	98	5
AT5G63020	0.328904	2	1
AT5G63070	0.272406	33	5
AT5G63490	5.46208	9	2
At5g63510	290.2	4	14
AT5G63680	633.433	66	2
AT5G64380	6.22779	33	2
AT5G64670	352.165	23	5
AT5G65220	0.4563	21	5
AT5G65260	0.44697	15	6
AT5G65750	919.177	60	2
AT5G67510	278.492	107	5
At5g67590	131.77	40	1
ATARCA	2.02198	34	5
ATARD2	0	4	8
ATCAD4	850.37	7	2
AtCg00380	5847.99	109	5
AtCg00790	577.523	27	1
AtCg00800	8039.13	111	1
ATCS	560.607	75	2
ATERDJ3B	6.21332	21	13
ATG6	1.87696	7	11
ATHP1	0.396825	5	3
ATJ1	6.24751	26	13
ATLIG4	3365.65	21	11
ATM	64.3307	27	11
AtMg00080	577.523	27	1
AtMg00090	34.747	96	5
ATP1	8860.56	71	1
ATP3	1726.72	74	1
ATP5	937.68	70	1
ATP6-1	344.502	46	1
atp6-1	133.615	35	1
ATP6-2	157.626	45	1
ATPA	10967.1	82	1
ATPC1	33777.6	151	1
ATPC2	2002.54	78	1
ATPD	23333.5	137	1
ATPE	5173.13	100	1
ATPF	2464.71	81	1
ATPH	3185.93	81	1
ATPI	2222.65	84	1
ATPQ	139146	88	1
ATR	5042.09	41	11
ATRAD17	53.625	31	11
ATS9	1876.01	69	7
ATSAC1	0	2	6
ATXRCC1	1.80623	11	11
AUX1	3	7	3
AVA-P1	721.43	30	1
AVA-P2	729.7	38	1
AVA-P4	729.7	38	1
AVP1	0.492758	25	1
BBC1	86.8554	70	5
BCE2	187.893	30	2
BGL2	478.808	14	3
BIP1	411.405	62	13
BIP2	10.7943	29	13
BIP3	361.129	60	13
BRI1	316.065	7	3
C4H	14.6678	8	10
CA1	9040.78	23	1
CA2	1428.77	8	14
CAB1	20215.7	33	1
CAB3	5.27423	33	1
CAC2	141.167	4	1
CAC3	53.8834	5	2
CAD5	2124.51	9	2
CAT	1357.25	16	2
CAT1	716.187	12	2
CBSCBSPB4	5.46208	9	2
CBSX3	5.46208	9	2
CCA1	5296.92	13	12
CCMH	0	1	1
CDC2	0	58	7
CDC45	540.875	33	11
CDC5	0	32	13
CDC6	605.427	34	11
CDKB2;2	0	3	7
CESA6	0	1	4
CFIM-25	38.0032	17	6
CH1	0	5	1
CHAT	0	1	2
CHI	93.1151	10	3
ChiC	0.125	5	3
CHL-CPN10	157.265	38	13
CHLI1	218.413	9	1
CHLM	323.519	19	1
CI51	351.947	46	1
CIB22	94.7911	21	1
cICDH	99.1892	41	2
CKB3	0	2	12
CLH1	5811	6	3
CLP2	67.5004	10	13
CLPC1	4888.93	61	13
CLPP3	186.977	11	13
CLPP5	0.217128	8	13
CLPR1	67.5004	10	13
CLPR4	67.3754	9	13
CLPX	67.9521	10	13
c-NAD-MDH1	434.229	64	2
c-NAD-MDH2	1283.03	64	2
c-NAD-MDH3	331.475	60	2
cob	731.792	41	1
COI1	16614.3	31	3
CORI3	24569.7	18	8
COX1	350.071	38	1
COX2	2154.22	46	1
CP12-2	0	2	1
CP29	1.60276	13	1
cpHsc70-1	1275.94	75	13
cpHsc70-2	1238.27	74	13
CPN10	2370.59	48	13
CPN20	2611.47	48	13
CPN60A	14036	64	13
CPN60B	10647.5	56	13
Cpn60beta2	6994.47	53	13
Cpn60beta3	6635.92	49	13
Cpn60beta4	1637.15	47	13
CPSF100	38.0032	17	6
CPSF160	2084	18	6
CPSF30	1648.87	16	6
CPSF73-I	38.0032	17	6
CPT	0	16	9
cPT5	0	16	9
cPT6	0	16	9
cPT8	0.114286	17	9
cPT9	0	16	9
CR88	511.064	49	13
CRB	13252.6	63	1
CRD1	1097.21	47	1
CSDP1	0.359751	11	6
CSP41A	723.11	41	1
CSTF64	2084	18	6
CSTF77	2084	18	6
CSY1	530.447	73	2
CSY2	2520.08	76	2
CSY3	3208.37	77	2
CSY5	530.447	73	2
CTR1	7.07619	12	3
CUL1	0	2	3
CYCA3;4	26.7255	59	7
CYN	0	2	14
CYTC-1	19255.3	45	1
CYTC-2	15325.2	48	2
DAD1	715.113	10	3
DAU2	0	8	6
DCL1	1730.49	18	6
DCL2	473.225	16	6
DCL4	365.14	13	6
DFR	93.0896	7	10
DGAT2	1.25	10	3
DGK4	0.666667	8	3
DIN4	77.2941	24	2
DOT2	0	32	13
DOX1	0	8	3
DPB2	318.942	30	11
DRT112	2505.38	66	1
DUO1	22.1108	16	6
DUO3	11668.9	25	6
DUT1	3.74604	11	2
E1-BETA-1	69.4767	29	2
EB1a	66.4668	15	4
EB1B	66.4668	15	4
EB1C	66.4668	14	4
EBF1	0.142857	5	3
EBP	71.8767	3	3
EDA36	914.458	45	2
EDS1	5.13285	10	3
EDS16	30.4009	15	3
EDS5	5.11027	10	3
eEF-1Bb1	1.6879	29	5
EI305	1.05952	8	3
EIL1	578.046	8	3
EIN2	3965.6	22	3
EIN3	3936.3	16	3
ELF3	0.422222	11	12
ELF4	0.422222	11	12
ELF7	3.2506	9	4
EMB1080	874.901	114	5
emb1129	34.7239	96	5
emb1220	0	32	13
EMB1241	6663.1	88	13
EMB1467	6492.24	51	1
emb1473	458.715	24	5
emb1644	0	32	13
EMB1968	2041.4	53	11
EMB2024	0.261948	7	2
EMB2107	1519.9	68	7
EMB2207	1035.16	126	5
EMB2296	1285.65	127	5
emb2386	0.95262	95	5
emb2394	885.74	27	5
EMB2719	1519.9	68	7
emb2726	14627.1	107	5
emb2742	0	5	2
EMB2763	3923.49	17	6
EMB2765	0	32	13
EMB2769	0	32	13
EMB2770	0	32	13
EMB2771	3.2506	12	4
EMB2775	87.9298	45	11
EMB2780	1401.47	41	11
EMB2804	0	2	4
EMB2810	1608.75	45	11
EMB3003	424.746	53	2
EMB3007	1637.15	47	13
EMB3010	0	47	5
EMB3011	0	32	13
EMB3105	377.508	26	5
EMB3113	3346.11	107	5
EMB3119	272.852	17	2
EMB3126	131.96	21	5
EMB3127	188.758	25	2
EMB3136	794.982	26	5
EMB3137	271.76	109	5
EMB3142	0	2	13
EMB3147	0	2	2
ENO1	2129.25	87	2
ENOC	1701.4	85	2
ERA1	0.9375	21	9
ERD5	0	1	2
ERF1	246.899	8	3
ERF13	1.8002	3	3
ERF71	0	3	2
ERF73	0	2	2
ETG1	0.0660569	15	11
ETO1	0.166667	7	3
ETR1	16824.9	37	3
F3H	93.0896	7	10
FBA1	1555.49	50	2
FBA2	14100.7	128	1
FBA4	356.542	82	2
FBA5	356.542	82	2
FBA6	18.6917	35	2
FBA7	356.542	82	2
FBA8	356.542	82	2
FBL17	5.70877	12	6
FBP	4.17699	31	2
FD1	0.047619	4	2
FD2	948.654	45	1
FdC1	1665.61	27	2
FdC2	482.529	16	1
FDH	1.35333	22	2
FIP1[V]	2084	18	6
FLS1	0.549889	6	10
FNR1	7991.28	57	2
FPS1	1037.51	37	9
FPS2	1037.51	37	9
FTSH11	0.0629036	3	1
ftsh4	0.0629036	3	1
FUM1	202.326	41	2
FUM2	2.63026	21	2
FUS5	0	5	7
G6PD1	1119.16	62	2
G6PD2	739.075	57	2
G6PD3	797.192	59	2
G6PD4	739.075	57	2
G6PD5	747.982	58	2
G6PD6	784.395	58	2
GAD	22348	39	2
GAD3	49.4091	29	2
GAD4	49.4091	29	2
GAD5	49.4091	29	2
GAMMACA1	290.2	5	14
GAMMACA2	291.15	7	14
GAMMACA3	290.2	5	14
GAMMACAL2	290.4	6	14
GAPA	28413.7	104	2
GAPA-2	17802.1	103	2
GAPB	14951.9	132	1
GAPC1	510.509	68	2
GAPC2	510.802	55	2
GAPCP-1	721.687	67	2
GAPCP-2	836.089	66	2
GDCH	1313.75	53	2
GDH1	1639.53	71	2
GDH2	1562.49	70	2
GDH3	1562.49	70	2
GEX1	0.974242	8	6
GEX2	21.0648	17	6
GFA2	7.8792	26	13
GGAT1	1069.05	29	2
GGPS1	1065.75	37	9
GGPS2	1065.75	37	9
GGPS3	1065.75	37	9
GGPS4	1065.75	37	9
GGPS6	1065.75	37	9
GGR	1065.75	37	9
GI	0.422222	11	12
GLDP1	21558.4	83	2
GLDP2	12894.6	72	2
GLN1.3	70.6061	29	2
GLN1;4	70.6061	29	2
GLN1;5	70.6061	29	2
GLN1-1	70.6061	29	2
GLT1	48667.8	140	2
GLU1	28040.2	120	2
GLU2	8974.73	95	2
GLYR1	558.894	20	2
GLYR2	729.012	21	2
GOX1	2858.7	42	2
GOX2	35274	56	2
GPAT1	0	3	3
GPS1	767.599	32	9
GR	10892.4	40	2
GRP9	0	1	2
GRXS17	0.0629036	4	1
GS2	2003.35	40	2
GSR2	4.27597	7	2
GUN4	35.8572	18	1
GUN5	594.687	22	1
HAOX1	2711.73	40	2
HAOX2	2711.73	40	2
HAP2	5.2325	7	6
HB1	0	2	2
HCAR	0	3	3
HCEF1	5945.62	83	2
HCF136	85.0844	26	1
HCF173	2.96699	17	1
HCF244	3.02581	18	1
HCHIB	6687.38	14	3
HCS1	0	2	2
HCS2	0	2	2
HDR	18.8891	21	9
HEN2	2879.53	23	6
HESO1	3087.7	22	6
HEXO1	0.125	5	3
HEXO2	0.125	5	3
HEXO3	0.125	5	3
HKL3	8.03803	37	2
HMGS	2174.6	9	9
Hop1	3.2804	18	13
Hop2	2.19522	21	13
Hop3	1.43894	19	13
HOT5	2937.77	17	2
HP6	0.396825	5	3
HPL1	172380	6	3
HPR	9846.87	81	2
HPR3	61.4181	18	2
HPT1	34.5878	22	9
HSC70-1	15101.1	120	13
HSF1	0	19	13
HSFA2	41.1083	19	13
HSFA3	0	19	13
HSK	161.392	7	2
HSP101	3692.06	58	13
HSP60	9927.38	62	13
HSP60-2	15599.4	52	13
HSP60-3A	1637.51	50	13
HSP70	8165.88	119	13
Hsp70-15	782.038	81	13
HSP70-18	6886.54	113	13
Hsp70-2	7078.31	115	13
Hsp70b	6968.49	115	13
HSP70T-2	386.882	59	13
Hsp81.4	126.466	47	13
HSP81-2	120.713	43	13
HSP81-3	126.35	46	13
Hsp89.1	259.258	47	13
HSP90.1	322.451	58	13
HSP91	752.853	78	13
HSP93-III	4888.93	61	13
HXK1	6981.92	41	2
IAR4	636.891	54	2
ICDH	178.438	48	2
ICL	296.998	23	2
ICU2	1511.4	48	11
IDH1	118.553	42	2
IDH2	107.484	42	2
IDH-III	74.7133	36	2
IMPA-8	6118.54	12	6
iPGAM1	46.0156	44	2
iPGAM2	45.0573	42	2
IPP1	68.8401	28	9
IPP2	9.93504	26	9
IQD1	0	1	4
iqd2	1.39216	6	4
IQD23	1.39216	6	4
IQD31	0.47549	5	4
IRX4	77.0441	7	2
J2	50.7929	33	13
J20	33.221	31	13
J3	50.6263	32	13
J8	2.45099	30	13
JAR1	9779.15	14	3
JAZ1	2257.46	20	3
JAZ10	1027.31	16	3
JAZ11	1.22313	9	3
JAZ12	1.12313	8	3
JAZ3	402.956	14	3
JAZ4	1.6271	10	3
JAZ5	632.318	15	3
JAZ6	1.7648	11	3
JAZ8	1.04444	11	3
KLCR1	6021.8	17	4
KLCR2	5045.13	17	4
KLCR3	5989.22	18	4
KU70	118.753	36	11
KU80	42.697	28	11
La2	0.0912698	5	6
LDOX	92.5397	6	10
LHB1B1	0.242366	33	1
LHCA1	810.25	59	1
LHCA2	975.795	61	1
LHCA3	948.861	58	1
LHCA4	234.444	50	1
Lhca5	5.1885	24	1
Lhca6	1116.23	31	1
LHCB2.3	2.68408	18	1
LHCB3	1498.77	63	1
LHCB4.1	1074.84	61	1
LHCB4.2	361.854	56	1
LHCB4.3	21.6972	27	1
LHCB5	2670.78	74	1
LHCB6	714.462	57	1
LHY	5296.92	13	12
LIG6	108800	65	11
LIS	0	32	13
LKP2	0.2	9	12
LOS2	4941.93	92	2
LOX1	219.394	15	3
LOX2	81337.4	29	3
LOX3	16988.6	23	3
LOX4	11125.1	21	3
LOX5	9.75758	12	3
LOX6	7590.93	16	3
LPD1	9604.56	62	2
LrgB	15.1503	12	1
LTA2	420.84	52	2
LTA3	668.365	62	2
LTO1	0	3	1
MAB1	2768.63	70	2
MAC3A	0	32	13
MAC3B	0	32	13
MAT3	0	1	8
MATK	505.981	45	1
MCM2	905.553	43	11
MCM3	508.036	43	11
MCM4	835.926	46	11
MCM5	665.119	46	11
MCM6	502.731	41	11
MCM9	903.28	41	11
MDH	353.273	61	2
MEE34	3217.56	70	7
MEE44	25269.7	34	6
MEE51	70.6651	51	2
MET3-1	194.014	15	2
MFP2	0.111111	5	3
MGD2	0.25	9	3
MGE1	1217.32	82	13
MGH3	80.0356	18	6
MK	12.5472	11	9
MLS	2385.96	52	2
mMDH1	418.39	65	2
MNS1	0.677778	6	3
MOR1	33517.9	19	4
MOS4	0	32	13
MPK4	24.7226	9	3
MPPalpha	1254.1	35	1
MPPBETA	2564.38	48	1
MRE11	83.7681	32	11
MRH2	2.4835	6	4
MRN1	0	1	15
MTHFR1	6.3035	14	2
MTHFR2	6.37493	15	2
mtHsc70-1	15143	76	13
MTHSC70-2	663.274	70	13
mtLPD1	9683.14	69	2
mtLPD2	8397.47	64	2
MTO2	0.24446	6	2
MTO3	0	1	8
MTR4	2731.35	23	6
MVD1	606.049	26	9
MYB2	0	1	2
MYC2	13195.9	28	3
NAD1A	3.56714	24	1
NAD1B	81.6292	33	1
NAD1C	3.56714	24	1
NAD2A	2.17757	23	1
NAD2B	2.17757	24	1
NAD4	853.195	42	1
NAD7	1128.97	37	1
NAD9	1973.86	67	1
NAD-ME1	358.108	62	2
NAD-ME2	372.316	63	2
NADP-ME1	94.1967	41	2
NADP-ME2	287.297	55	2
NADP-ME3	103.036	42	2
NADP-ME4	95.227	41	2
NAGK	40.284	6	2
NAGS1	269.615	21	2
NBS1	0.906395	10	11
NCED3	0	2	2
NDHA	373.447	64	1
NDHB.1	2.17757	23	1
NDHB.2	2.17757	23	1
NDHC	599.639	67	1
NDHD	506.779	69	1
NDHE	340.95	62	1
NDHF	589.019	66	1
NDHG	351.992	60	1
NDHH	1654.93	80	1
NDHI	586.109	56	1
NDHJ	1354.26	71	1
NdhL	9.75979	5	1
NdhN	2.08196	5	1
NdhT	9.54781	33	13
NFD3	6.41514	95	5
NIR1	4326.42	32	2
NOL	0	3	3
nPAP	1122.14	12	6
NPQ4	3507.13	83	1
NPR1	16274.4	20	3
NRPA2	13.0539	10	1
NRPB1	0	2	1
NRPB2	0	6	1
NRPC2	0	6	1
NRPD1A	0	3	1
NRPD1B	0	3	1
NRPD2A	0	7	1
NRPD2B	0	7	1
NYC1	0	3	3
OASB	649.363	9	2
OHP	0.477093	9	1
OMT1	69.3279	6	2
OPCL1	359.167	10	3
OPR2	2.5	5	3
OPR3	139.626	20	3
ORA59	0	2	3
ORC1A	1.53392	28	11
ORC1B	148.232	31	11
ORC2	5.39002	27	11
ORC3	0.0243902	23	11
ORC5	1.86098	25	11
ORF110A	0.778068	5	1
OTC	25.9015	6	2
P40	5050.2	124	5
PA200	1518.66	67	7
PAC1	1519.9	68	7
PAD1	1519.9	68	7
PAD2	1519.9	68	7
PAD3	149.814	7	3
PAD4	14.7086	13	3
PAE1	1519.9	68	7
PAE2	1519.9	68	7
PAF1	1519.9	68	7
PAF2	1519.9	68	7
PAG1	1519.9	68	7
PAH1	0.666667	9	3
PAH2	0.666667	9	3
PAPS2	75250.2	21	6
PAPS3	2046.14	16	6
PARP1	36.8803	25	11
PARP2	2.893	8	11
PB	24984.1	107	1
PBA1	1519.9	68	7
PBB1	1519.9	68	7
PBB2	1519.9	68	7
PBC1	1519.9	68	7
PBC2	1519.9	68	7
PBD1	1519.9	68	7
PBD2	61.0634	62	7
PBE1	61.0634	62	7
PBF1	1519.9	68	7
PBG1	1519.9	68	7
PCB2	578.771	24	1
PCK1	342.476	53	2
PCK2	292.23	52	2
PCL1	0.2	10	12
PCLPP	22187.8	62	1
PCNA1	3805.21	64	11
PCNA2	3476.3	58	11
PD1	0	3	8
PDAT	1.25	10	3
PDC2	2607.1	13	2
PDC3	1775.7	9	2
pde194	0	12	2
PDE334	603.384	41	1
PDE345	350.124	81	2
PDF1.2	20675.9	27	3
PDF1.2b	0	1	3
PDS1	0	1	8
PEPKR1	0	9	3
PEPKR2	0	9	3
PETA	1409.02	61	1
PETB	3834.26	86	1
PETC	35452.7	134	1
PETD	2812.7	81	1
PETE1	355.493	47	1
PETG	61.8244	34	1
PFK1	111.815	57	2
PFK2	433.983	57	2
PFK3	69.9556	56	2
PFK4	69.9556	56	2
PFK5	433.983	57	2
PFK6	70.8163	57	2
PFK7	220.878	58	2
PGI1	8461.52	93	2
PGK	11014.1	77	2
PGK1	21943.6	104	2
PGL1	0.261948	7	2
PGL2	0.261948	7	2
PGL4	0.261948	7	2
PGL5	0.261948	7	2
PGLP1	608.344	40	1
PGLP2	325.666	11	2
PGM2	381.625	40	2
PGM3	519.925	41	2
PGMP	1760.68	44	2
PGRL1A	76.3359	29	1
PGY1	146.318	107	5
PHP	3.2506	9	4
PHS2	70.9342	16	2
PHT3;1	0.170761	14	1
PHT3;2	0.170761	12	1
PHT3;3	0.170761	12	1
PI4KA1	258.953	10	11
PK1	2.01982	8	11
PKp3	648.702	66	2
PKP-ALPHA	11196.5	71	2
PKP-BETA1	894.855	67	2
PLA2-ALPHA	723.2	12	3
PMDH1	1368.92	67	2
PMDH2	32892.9	132	2
PnsB1	176.087	27	1
PnsB2	237.116	10	1
PnsB3	804.2	23	1
PnsL1	38.1444	24	1
PnsL2	2.89642	11	1
POLA2	516.396	40	11
POLA3	516.645	41	11
POLD2	4.5057	25	11
POLH	6.00251	20	11
POP2	9.89195	10	2
PORC	0	1	3
PPa1	0.492758	26	1
PPa2	0.492758	25	1
PPa3	0.492758	25	1
PPa4	0.492758	25	1
PPa5	0.53122	27	1
PPa6	557.752	31	1
PPC1	50.1834	33	2
PPC2	827.401	56	2
PPC3	101.81	36	2
PPC4	40.8724	31	2
PPCK1	0	9	3
PPCK2	0	9	3
PPDK	102.466	27	2
PPL1	16.528	19	1
PPT1	51.4503	21	9
PR1	429.192	8	3
PR4	569.777	7	3
PR5	1361.83	16	3
PRC3	1519.9	68	7
PRK	10728.3	96	1
PRL	817.012	44	11
PRL1	0	32	13
PRPL11	1037.94	28	5
PRR5	0.422222	11	12
PRR7	0.222222	10	12
PRR9	0.422222	11	12
PRXQ	834.296	34	1
PSAA	2499.71	65	1
PSAB	3614.26	63	1
PSAC	14789.6	75	1
PSAD-1	1478.74	68	1
PSAD-2	407.328	59	1
PSAE-1	481.81	62	1
PSAE-2	157.364	55	1
PSAF	2072.02	72	1
PSAG	1226.28	64	1
PSAH-1	521.816	60	1
PSAH2	364.311	57	1
PSAI	5.15105	45	1
PSAJ	129.578	39	1
PSAK	1285.31	65	1
PSAL	428.502	61	1
PSAN	2532.73	69	1
PSAO	844.436	57	1
PSB29	29.6552	9	5
PSBA	1754.45	58	1
PSBB	1775.06	59	1
PSBC	1341.67	66	1
PSBD	353.862	52	1
PSBE	1107.58	61	1
PSBF	2235.57	53	1
PSBG	866.336	69	1
PSBH	384.212	56	1
PSBI	440.316	52	1
PSBJ	163.362	22	1
PSBK	366.057	53	1
PSBL	48.8078	41	1
PSBO1	4258.25	76	1
PSBO2	3475.23	82	1
PSBP-1	5283.13	88	1
PSBQ-2	1226.52	64	1
PSBQA	5535.21	81	1
PSBR	69.2217	39	1
PSBTN	277.655	53	1
PSBW	994.136	47	1
PSBX	89.0644	49	1
PSBY	617.136	61	1
PSI-P	2084.97	77	1
PSY	159.778	29	9
PTAC16	83.5677	18	1
PUR4	5684.48	40	2
PYD4	5043.05	51	2
RAB7B	1.12903	9	4
RABE1b	18.9708	79	5
RABG3A	1.12903	9	4
RABG3B	1.12903	9	4
RABG3c	1.12903	9	4
RABG3d	1.12903	9	4
RACK1B_AT	1.15272	32	5
RACK1C_AT	1.80505	33	5
RAD5	12.9517	12	11
RAD50	33.0598	26	11
RAPTOR1	1.87696	7	11
RAPTOR2	1.87696	7	11
RBCL	9138.38	67	1
RBCS1A	2211.69	33	1
RBCS1B	794.156	16	2
RBCS2B	281.497	14	2
RBCS3B	156.151	8	1
RbcX2	0	2	1
RCA	166421	126	1
RDH2	0	2	2
REV1	3.97844	18	11
REV3	1525.49	39	11
REV7	0.0993506	16	11
RFC2	59.7787	38	11
RIG	151.838	106	5
RNR1	443.299	35	11
RNR2A	58.6573	20	11
RPA2	2203.53	52	11
RPA70B	1932.95	53	11
RPA70D	1936.5	54	11
RPE	1065.63	30	2
RPI2	29.9387	15	2
RPL10B	11.7094	49	5
RPL15	1033.09	27	5
RPL16A	158.195	106	5
RPL22	126.474	21	5
RPL23AA	278.492	107	5
RPL23AB	278.492	107	5
RPL24	515.441	23	5
RPL27AB	176.5	105	5
RPL3B	127.816	69	5
RPL3P	0.4563	21	5
RPL4	490.609	24	5
RPL5A	1502.58	131	5
RPL5B	1286.02	130	5
RPN10	1519.9	68	7
RPN12a	1519.9	68	7
RPN12b	1519.9	68	7
RPN13	61.129	64	7
RPN1A	1519.9	68	7
RPN1B	1519.9	68	7
RPN5B	1519.9	68	7
RPN8A	1876.01	69	7
RPOA	2759.37	54	1
RPOB	4702.92	56	1
RPOC1	1611.8	55	1
RPOC2	1420.85	52	1
RPP8	0.328904	2	1
RPS1	43034	94	5
RPS11	159.321	103	5
RPS11-BETA	878.95	115	5
RPS12A	870.506	37	5
RPS13A	34.3789	97	5
rps14	34.7461	96	5
RPS15AD	34.8086	99	5
RPS16	2.03323	38	1
RPS17	34.745	97	5
RPS5A	271.635	105	5
RPS5B	634.465	113	5
RPS6A	148.505	103	5
RPS7	271.635	105	5
RPS7.1	271.635	104	5
RPS7.2	271.635	105	5
RPS8	8802.53	64	1
RPS9	5493.22	118	5
RPSAb	1.74054	32	5
RPT1A	1518.66	67	7
RPT2a	1519.9	68	7
RPT2b	1519.9	68	7
RPT3	1519.9	68	7
RPT4A	9.33144	66	7
RPT5A	1519.9	68	7
RPT5B	8297.14	69	7
RPT6A	1519.9	68	7
RR1	5.88275	9	3
RR17	10.5494	11	3
RR2	2.90481	7	3
RR22	13.9462	13	3
RSW10	158.038	17	2
RTE1	0	4	3
SAC52	186.224	106	5
SAD1	0	32	13
SAG24	79.5052	105	5
SAM1	0	1	8
SAM-2	0	1	8
SAPX	0.328904	2	1
SBPASE	5865.58	91	2
SCL22	0	2	6
SCL27	0	2	6
SCO1	19.2802	87	5
SDH1-1	470.382	52	2
SDH1-2	173.479	47	2
SDH2-1	2201.24	57	2
SDH2-2	2499.53	56	2
SDH2-3	165.708	47	2
SDH3-1	5131.48	34	2
SDH3-2	2808.3	33	2
SDP1	7946.78	22	3
SDP1-LIKE	7946.78	22	3
SERAT2;2	3.50653	2	2
SETH3	596.994	14	2
SFGH	7.92997	2	2
SGT1A	1.2554	9	13
SGT1B	0.644524	7	13
SHD	41509.3	93	13
SHM1	76790.5	89	2
SHM2	978.531	46	2
SHM3	1232.83	47	2
SHM4	940.28	46	2
SHM6	1082.18	46	2
SHM7	914.458	45	2
SIR	1076.45	21	2
SKIP	0	32	13
SKP1	1.95492	4	3
SNF4	5.46208	10	2
SOX	12.5335	6	2
SPC98	2.52556	13	4
SPS1	267.039	27	9
SPS2	267.039	27	9
SUS1	0	2	2
SUS4	0.590909	4	2
TAFII21	0.211111	3	11
TAG1	1.25	10	3
TAPX	0.328904	2	1
TCP-1	1487.34	52	13
TCP11	0	1	12
TE1	385.566	8	3
THA1	50.9495	18	2
THA2	65.4552	18	2
THFS	205.319	26	2
THI2.1	0	2	3
THO2	29.8373	16	6
THY-1	70364.7	74	2
THY-2	71820	75	2
TIC110	220.211	7	13
TIC40	0.0163934	3	13
Tic62	352.003	28	1
TIFY10B	638.115	16	3
TIFY7	402.956	14	3
TIL1	1131.09	45	11
TIL2	781.936	39	11
TIM	840.395	75	2
TLP18.3	1717.16	74	1
TOC1	5303.22	12	12
TOR	838.658	13	11
TPI	229.542	73	2
TPR10	10922.1	31	13
TPR12	3315.43	17	4
TPR15	5.14695	24	13
TPR16	5.14695	24	13
TRA2	3751.98	83	2
TROL	6.39853	19	1
TRXF1	186.714	34	2
TSB1	17.9539	13	2
TSB2	17.9539	13	2
TSO2	60.2999	22	11
TT4	1430.6	9	10
TT5	6654.49	7	10
TTN1	8.52556	12	4
TUA5	8662.84	31	4
TUB1	787.65	18	4
TUB2	457.359	14	4
TUB3	787.65	18	4
TUB4	787.65	22	4
TUB5	787.65	22	4
TUB6	790.15	19	4
TUB7	939.095	23	4
TUB8	787.65	22	4
TUB9	1185.66	25	4
TUBG1	646.111	16	4
U2A	0	32	13
UAH	1767.6	16	2
UBP6	61.0806	62	7
UBP7	61.0806	62	7
UBQ6	25.5405	59	7
UCH1	61.0806	62	7
UCH2	61.129	64	7
UGLYAH	0	1	2
UGP1	64.4805	13	2
UK/UPRT1	375.453	13	2
UKL2	375.453	13	2
UKL3	430.016	14	2
UKL4	375.453	13	2
UKL5	430.016	14	2
UPP	150.401	8	2
URE	12.7783	3	2
URH1	0	6	2
UVH3	1224.12	25	11
VHA-A	147.946	18	1
VHA-C3	729.726	39	1
VHP2;2	0.492758	25	1
VIP4	3.2506	9	4
VLN1	1930.62	4	4
VPS15	1.87696	7	11
VPS34	1504.32	14	11
VSP1	0.452381	4	3
VSP2	2.70609	6	3
WIN1	123.525	14	2
XRN3	1796.1	17	6
XRN4	2736.58	19	6
XW6	36.1478	95	5
YCF10	81.8893	47	1
YCF3	2.79932	43	1
YCF4	59.1665	47	1
YCF5	4.81246	44	1
ZIM	104.875	11	3
ZTL	0.2	10	12
ZWI	21.0954	13	4

## Sheet: Means
Property	Mean
Betweenness	2594.92
Node degree	37.11
